# Supplementary material for: A novel hydrolytic reaction to morphology-controlled TiO2 micro/nanostructures for enhanced photocatalytic performances
Source: Royal Society of Chemistry journal article supplement (doi:10.1039/c5ra04524j), 2015-01-01
Supplement: c5ra04524j1.pdf [file c5ra04524j1.pdf]

# **A Novel hydrolytic reaction to morphology-controlled TiO<sub>2</sub> micro/nanostructures for enhanced photocatalytic performances**

## **Supporting Information**

He Cheng<sup>1,2a</sup>, Gongde Chen<sup>1,2a</sup>, Weixin Zhang<sup>1,2,\*</sup>, Maoqin Qiu<sup>1,2</sup>, Zeheng Yang<sup>1,2</sup>, Xiao Zhu<sup>1,2</sup>,

Guo Ma<sup>1,2</sup>, and Yu Fu<sup>1</sup>

<sup>1</sup>School of Chemistry and Chemical Engineering, Hefei University of Technology, Hefei, Anhui  
230009, PR China

<sup>2</sup>Anhui Key Laboratory of Controllable Chemical Reaction & Material Chemical Engineering,  
Hefei, Anhui 230009, PR China

<sup>a</sup>These authors are co-first authors, who contributed equally to this work.

---

\*Corresponding author

Tel.: 86-551-62901450; Fax: 86-551-62901450

E-mails: wxzhang@hfut.edu.cn, (Weixin Zhang)

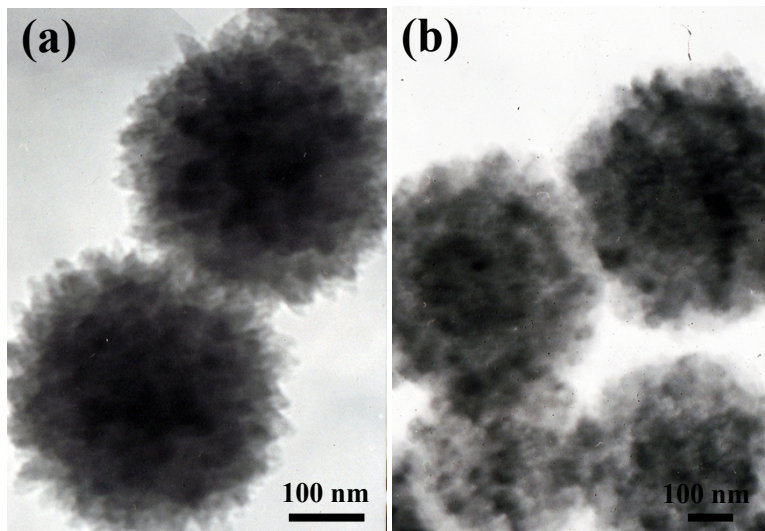

**Fig. S1. TEM images of the products prepared hydrothermally with the assistance of urea at different time intervals: (a) 0.5 h, (b) 1 h.**

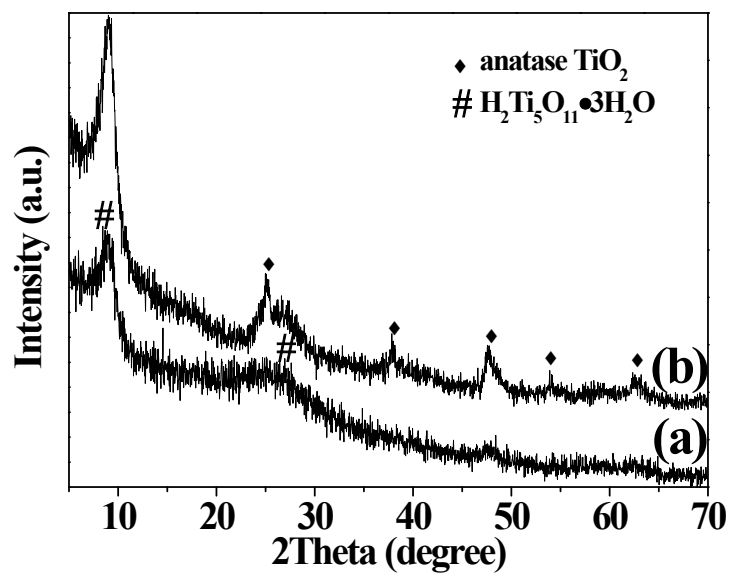

Fig. S2. XRD patterns of the samples synthesized through hydrothermal treatment of (NH<sub>4</sub>)<sub>2</sub>TiF<sub>6</sub> with the assistance of H<sub>2</sub>O<sub>2</sub> and urea for (a) 0.5 h and (b) 1 h.

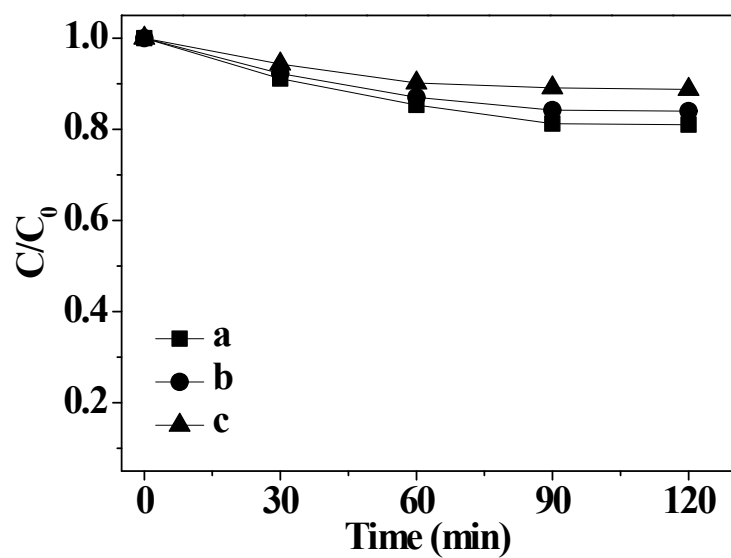

Fig. S3. The adsorption curves of RhB solution (initial concentration:  $1 \times 10^{-5}$  mol/L) over (a)  $\text{TiO}_2$  nanorods, (b)  $\text{TiO}_2$  core-shell nanospheres, and (c)  $\text{TiO}_2$  microspheres.

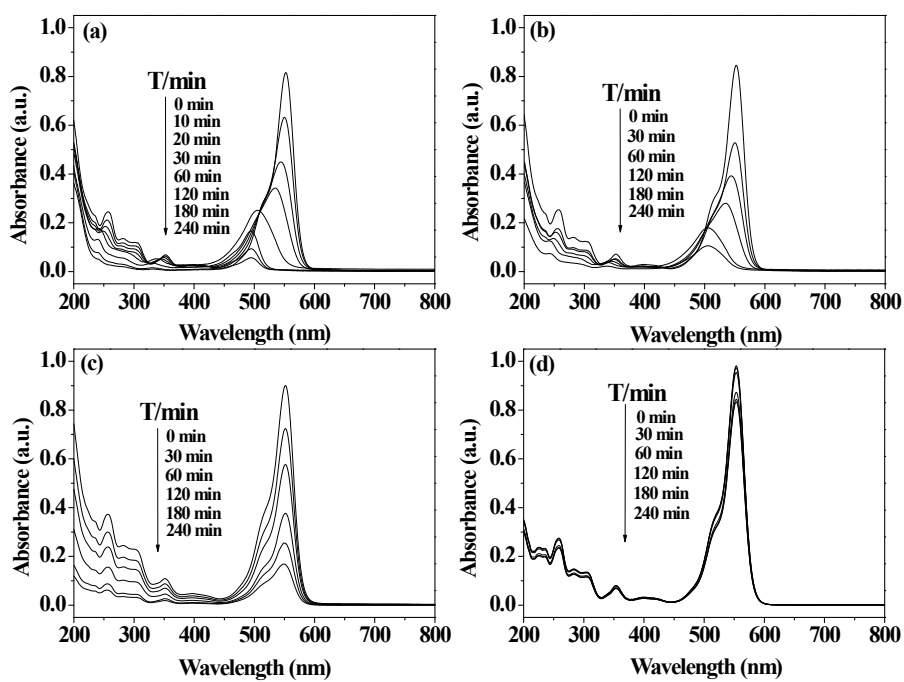

**Fig. S4. UV-vis spectral changes of RhB solution (initial concentration:  $1 \times 10^{-5}$  mol/L) under UV light irradiation in the presence of (a) TiO<sub>2</sub> nanorods, (b) TiO<sub>2</sub> core-shell nanospheres, (c) TiO<sub>2</sub> microspheres, and (d) in the absence of any photocatalyst.**

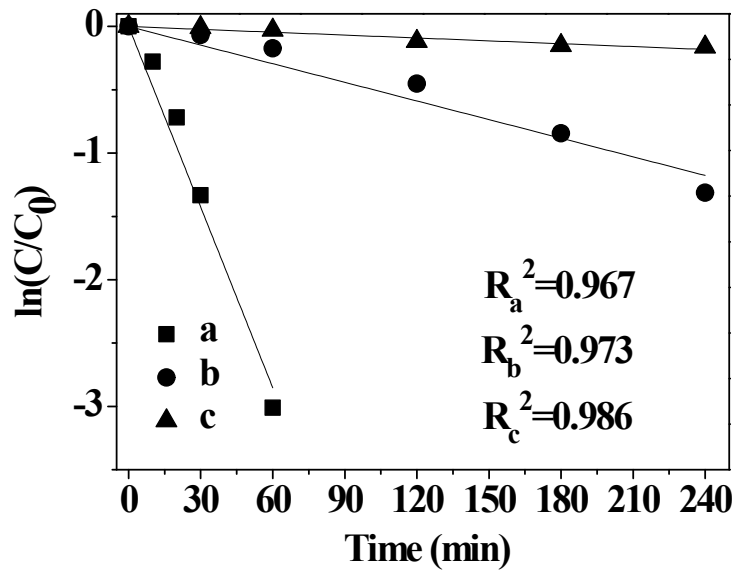

Fig. S5. The dependence of  $\ln(C/C_0)$  on UV light irradiation time  $t$  and their fitting plots: (a)  $\text{TiO}_2$  nanorods, (b)  $\text{TiO}_2$  core-shell nanospheres, and (c)  $\text{TiO}_2$  microspheres.

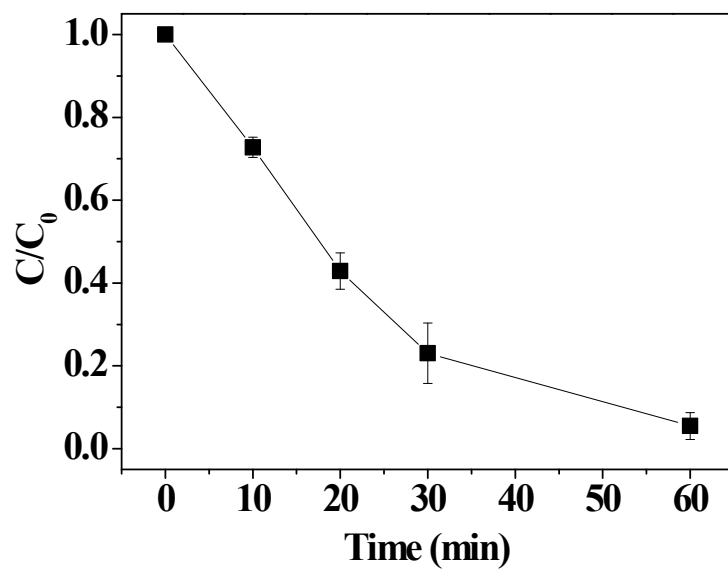

**Fig. S6. Photocatalytic degradation of RhB solution ( $1 \times 10^{-5}$  mol/L) under UV light irradiation in the presence of  $\text{TiO}_2$  nanorods. Each point represents the average value of four separate experiments derived from four batches of photocatalysts, and the vertical line represents the error range.**

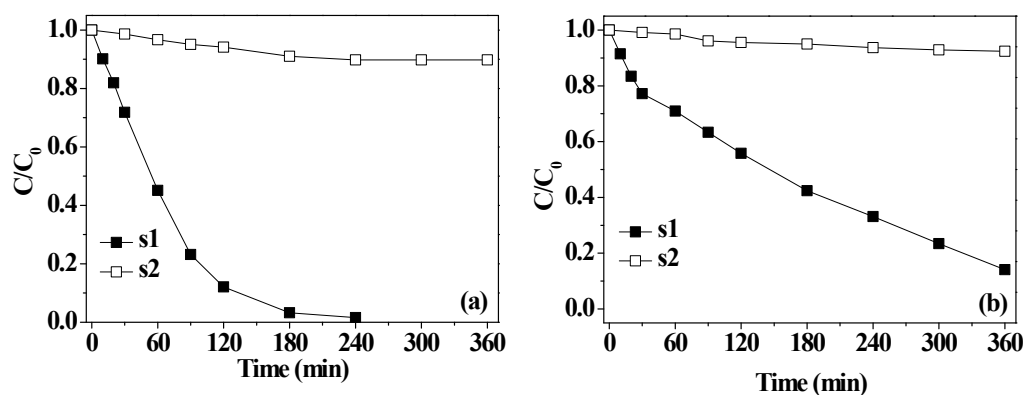

**Fig. S7. Photocatalytic degradation of RhB solution with initial concentration of (a)  $2 \times 10^{-5}$  and (b)  $5 \times 10^{-5}$  mol/L under UV light irradiation in the presence (s1)  $\text{TiO}_2$  nanorods and (s2) in the absence of any photocatalyst.**



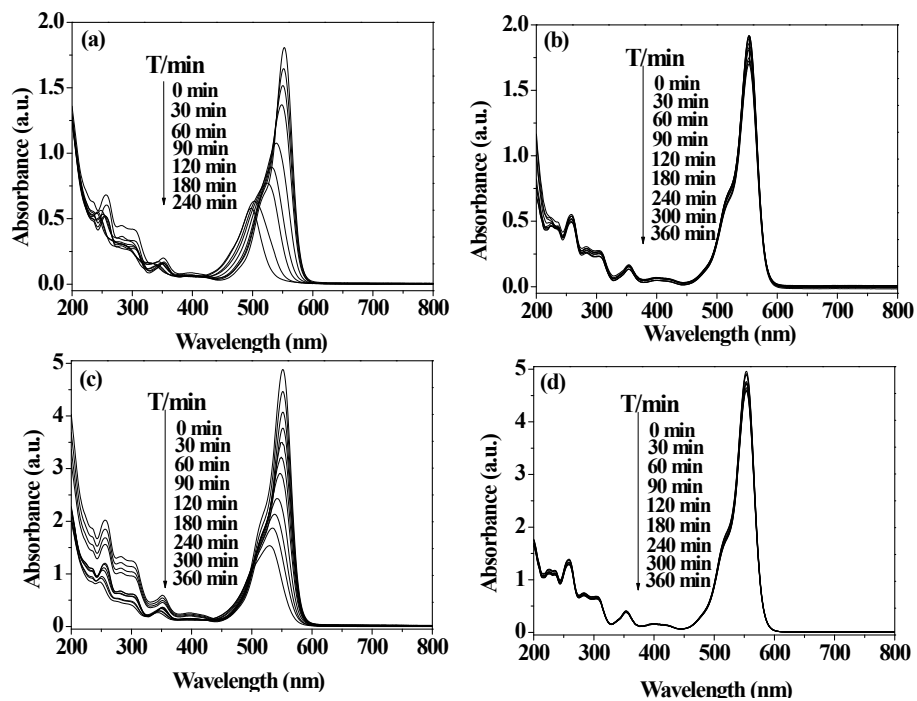

**Fig. S8.** UV-vis spectral changes of RhB solution under UV light irradiation in the presence of (a, c) TiO<sub>2</sub> nanorods and (b, d) in the absence of any photocatalyst. (Initial concentration: (a, b)  $2 \times 10^{-5}$  mol/L, (c, d)  $5 \times 10^{-5}$  mol/L).

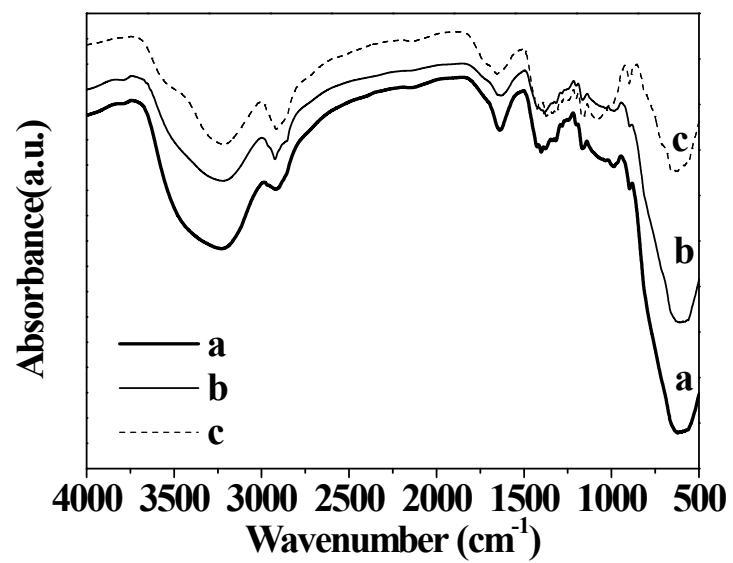

**Fig. S9** FT-IR spectra of the samples: (a) TiO<sub>2</sub> nanorods, (b) TiO<sub>2</sub> core-shell nanospheres, and (c) TiO<sub>2</sub> microspheres
